# Supplementary material for: Infection of the malaria vector Anopheles coluzzii with the entomopathogenic bacteria Chromobacterium anophelis sp. nov. IRSSSOUMB001 reduces larval survival and adult reproductive potential
Source: Springer Nature journal article supplement (doi:10.1186/s12936-023-04551-0), 2023-04-13
Supplement: MOESM1 [file 25238610]

Title: " **Infection of the malaria vector *Anopheles coluzzii* with the entomopathogenic bacteria *Chromobacterium sp. Burkina (C.sp\_B)* highly reduces larval survival and adult reproductive potentials**"

Authors: "Etienne BILGO" and " E. Jacques GNAMBANI "

Date: "31<sup>st</sup> October 2022"

### Larval Survival Analysis ###

## Data importation ##

```
dat<- read.table("larves.txt",header=TRUE,stringsAsFactors = T)
View(dat) colnames(dat)
```

```
# Data manipulations
```

```
colnames(dat)
```

```
library(reshape2)
```

```
#melt(Data set, column names to keep, column names to restructure) colnames(dat)
```

```
df=melt(dat, colnames(dat)[c(1,9)], colnames(dat)[2:8])
```

```
View(df)
```

```
library(plyr)
```

```
df2=ddply(df, .(Replicate,variable), transform, nval=sum(value, na.rm=TRUE))
View(df2) df3=ddply(df2, .(Replicate,variable), transform, Dead=cumsum(value))
View(df3) df3$Survival=(1-df3$Dead/df3$nval)*100 View(df3) colnames(df3)[3]="Treatments"
```

```
View(df3)
```

```
df5=subset(df3, Day!="Alives") df5$Day=as.numeric(as.character(df5$Day))
```

```
View(df5)
```

```
df6=ddply(df5, .(Day,Treatments), summarize, mean=mean(Survival),
replicates=length(Survival), se=sd(Survival)/sqrt(length(Survival)))
```

```

View(df6)
library(ggplot2)
limits=aes(ymax=mean+se, ymin=mean-se)
theme = theme_bw()+theme(text = element_text(size=25),
                           axis.title.x = element_text(size=25),
                           title = element_text(size=25),
                           legend.title = element_text(size=25),
                           legend.text = element_text(size=20))
cbPalette <-c(117,139,130,95,134,33,2,40,51,72)
Plt=ggplot(df6, aes(Day, mean,
                    color=Treatments))+geom_line(size=2)+geom_errorbar(limits, width=.1,
                    size=1)+theme+scale_colour_manual(values=cbPalette)+ylab("Survival rate
                    (%)")+xlab("Days")
#Displays the plot
Plt

```

```

## Calculation of LT50s ##
#####Load packages#####
library(tidyverse)
library(reshape2)
library(plyr)
library(scales)
library(survival)
library(MASS)
View(df5)
LTdat=df5
View(LTdat)
LTdat$Alives=LTdat$nval-LTdat$Dead
View(LTdat)
attach(LTdat)
surv.per=0.50

```

```

colnames(LTdat)
LTdat2=ddply(LTdat, .(Treatments, Replicate),
summarize,LT=as.numeric(dose.p(glm(cbind(Alives,Dead)~Day,binomial),p=surv.per)))
View(LTdat2)
LTdat2[LTdat2$LT>6|LTdat2$LT<0,]$LT=NA
LT50.Error=ddply(LTdat2, .(Treatments), summarize,"LT50 Mean"=mean(LT,na.rm=T),
se=sd(LT,na.rm=T)/sqrt(length(LT[!is.na(LT)])),Replicates=length(LT[!is.na(LT)]))
View(LT50.Error)
### Insemination Data Analysis ###
## Data importation ##
data <- read.table("Data_Ins.txt",header=TRUE,stringsAsFactors = T)
str(data)
summary(data)
table(data$Contact,data$Treatment)
attach(data)
View(data)
y <- cbind(Inseminated,Non_inseminated) # Variable de reponse binomiale
##GLMM##
library(glmmTMB)
mod<-glmmTMB(y~Treatment*Contact+(1|Replicate), family="binomial")
summary(mod)
mod2 <- update(mod,~.-Treatment:Contact)
anova(mod,mod2, test="Chi")  ### Il n'y a pas d'effet significatif de l'interaction
Treatment:Contact
summary(mod2)
mod3 <- update(mod2,~.-Contact)
anova(mod2,mod3, test="Chi")  ### Il y a un effet significatif du temps de Contact sur
le % d'insemination
library(multcomp)
summary(glht(mod2,linfct = mcp(Contact="Tukey"),interaction_averages = F))
# Estimate Std. Error z value Pr(>|z|)

```

```

#1h - 0.5h == 0  0.6929  0.1478  4.687 <1e-04 ***
#24h - 0.5h == 0  0.8674  0.1482  5.854 <1e-04 ***
#24h - 1h == 0  0.1745  0.1434  1.217  0.443
summary(mod2)
mod4 <- update(mod2,~.-Treatment)
anova(mod2,mod4, test="Chi") ### Il y a un effet significatif du traitement sur le %
d'insemination
library(multcomp)
summary(glht(mod2,linfct = mcp(Treatment="Tukey"),interaction_averages = F))
#           Estimate Std. Error z value Pr(>|z|)
#MI_FnI - MI_FI == 0  0.5024  0.1595  3.150 0.00876 **
#MnI_FI - MI_FI == 0  0.6896  0.1587  4.344 < 0.001 ***
#MnI_FnI - MI_FI == 0  2.8764  0.2004 14.352 < 0.001 ***
#MnI_FI - MI_FnI == 0  0.1872  0.1531  1.223 0.60927
#MnI_FnI - MI_FnI == 0  2.3740  0.1955 12.145 < 0.001 ***
#MnI_FnI - MnI_FI == 0  2.1868  0.1946 11.239 < 0.001 ***
library(car)
Anova(mod,Type=II)
#           Chisq Df Pr(>Chisq)
#Treatment    191.3870 3 < 2e-16 ***
#Contact       36.6516 2  1.1e-08 ***
#Treatment:Contact  7.4774 6  0.2789
#Plotting#
library(emmeans)
library(ggplot2)
### Interactions
data.graph <- summary(emmeans(mod, ~ Treatment | Contact), type="response")
data.graph
ggplot(data=data.graph, aes(x=Treatment, y=prob, fill=Contact)) +
  coord_cartesian(ylim = c(0, 1)) +
  ylab("Insemination rate ? CI95%") +

```

```

geom_bar(stat = "identity", position=position_dodge()) +
geom_errorbar(aes(ymin=lower.CL, ymax=upper.CL), position=position_dodge(.9),
width=.2)+
scale_fill_brewer(palette="Dark2")
### Effect of treatment ###
data.graph2 <- summary(emmeans(mod2, ~ Treatment), type="response")
data.graph2
ggplot(data=data.graph2, aes(x=Treatment, y=prob,fill=Treatment)) +
coord_cartesian(ylim = c(0, 1)) +
ylab("Activation rate ? CI95%") +
geom_bar(stat = "identity", position=position_dodge()) +
geom_errorbar(aes(ymin=lower.CL, ymax=upper.CL),
position=position_dodge(.9),width=.1)+
scale_fill_brewer(palette="Dark2") +
theme (legend.position = "non")
###Impact of contact time###
data.graph3 <- summary(emmeans(mod2, ~ Contact), type="response")
data.graph3
ggplot(data=data.graph3, aes(x=Contact, y=prob, fill=Contact)) +
coord_cartesian(ylim = c(0, 1)) +
ylab("Activation rate ? CI95%") +
geom_bar(stat = "identity", position=position_dodge()) +
geom_errorbar(aes(ymin=lower.CL, ymax=upper.CL),position=position_dodge(.9),
width=.1)+
scale_fill_brewer(palette="Dark2")+
theme(legend.position = "non")
### Wing data analysis ###
data <- read.table("Data_wing_female.txt",header=TRUE,stringsAsFactors = T)
str(data)
summary(data)
attach(data)

```

```

hist(Wing_size,freq=FALSE, col="grey")
lines(density(Wing_size), col="red")
library(car)
qqPlot(Wing_size)
shapiro.test(Wing_size) # W = 0.55961, p-value < 2.2e-16 # No de normality
fligner.test(Wing_size,Treatment)
# X? = 8.8591, df = 3, p-value = 0.03122 # No homogeniity of variances
kruskal.test(Wing_size~Treatment)
# chi-squared = 69.446, df = 3, p-value = 5.609e-15
x <- aov (Wing_size~Treatment)
summary(x)
#      Df Sum Sq Mean Sq F value Pr(>F)
#Treatment  3 263878  87959  8.081 3.97e-05 ***
TukeyHSD(x)
#      diff      lwr      upr    p adj
#FnI-FI -84.113725 -135.55882 -32.668635 0.0001983
#MI-FI  -49.549020 -103.03908  3.941038 0.0804125
#MnI-FI -86.477567 -138.12258 -34.832553 0.0001304
#MI-FnI  34.564706 -16.88038  86.009796 0.3058252
#MnI-FnI -2.363842 -51.88776  47.160077 0.9993237
#MnI-MI -36.928548 -88.57356  14.716467 0.2523871
### GLM ###
mod<-glm(Wing_size~Treatment)
summary(mod)
mod2 <- update(mod,~-Treatment)
anova(mod,mod2, test="Chi")
library(car)
Anova(mod)
#      LR Chisq Df Pr(>Chisq)
#Treatment 24.244 3 2.222e-05 ***

```

```

library (multcomp)
summary(glht(mod,linfct = mcp(Treatment="Tukey"),interaction_ average = F))
#      Estimate Std. Error z value Pr(>|z|)
#FnI - FI == 0  -84.114   19.870  -4.233  <0.001 ***
#MI - FI == 0   -49.549   20.660  -2.398  0.0775 .
#MnI - FI == 0  -86.478   19.947  -4.335  <0.001 ***
#MI - FnI == 0   34.565   19.870   1.740  0.3030
#MnI - FnI == 0  -2.364   19.128  -0.124  0.9993
#MnI - MI == 0  -36.929   19.947  -1.851  0.2493
library(ggplot2)
ggplot(data, aes(x=Treatment, y=Wing_size, fill=Treatment)) +
  geom_boxplot()+
  ylab("Wing size")+
  theme(legend.position = "non")
library(Rmisc)
data.graph <- summarySE(data, measurevar="Wing_size", groupvars="Treatment")
data.graph
ggplot(data=data.graph, aes(x=Treatment, y=Wing_size, fill=Treatment)) +
  coord_cartesian(ylim = c()) +
  ylab("Wing size ? se") +
  geom_bar(stat = "identity", position=position_dodge()) +
  geom_errorbar(aes(ymin=Wing_size-se,
ymax=Wing_size+se),position=position_dodge(.9), width=.1)+
  scale_fill_brewer(palette="Dark2")+
  theme(legend.position = "non")
boxplot(Wing_size~Treatment)$out
outliers <- c(348,329,345,349)
data2<- data[-which(data$Wing_size %in% outliers),] # retrait des outliers du jeu de
donn?e
boxplot(data2$Wing_size~data2$Treatment)

```

```

detach(data)
attach(data2)
hist(Wing_size,freq=FALSE, col="grey", ylim=c(0,0.008)) # Normalit? OK
lines(density(Wing_size), col="red")
library(car)
qqPlot(Wing_size)
shapiro.test(Wing_size) # W = 0.99411, p-value = 0.5531 # Normalit? Ok
fligner.test(Wing_size,Treatment) # X? = 3.7306, df = 3, p-value = 0.2921
# Homogeneity
#-----ANOVA-----#
x <- aov(Wing_size~Treatment)
summary(x)
#      Df Sum Sq Mean Sq F value Pr(>F)
#Treatment  3 210384  70128  36.41 <2e-16 ***
TukeyHSD(x)
#      diff      lwr      upr    p adj
#FnI-FI -35.91492 -57.91090 -13.918937 0.0002039
#MI-FI  -49.54902 -72.05306 -27.044983 0.0000002
#MnI-FI -86.47757 -108.20537 -64.749767 0.0000000
#MI-FnI  -13.63410 -35.63008  8.361875 0.3779589
#MnI-FnI -50.56265 -71.76380 -29.361502 0.0000000
#MnI-MI  -36.92855 -58.65635 -15.200747 0.0000999
mod<-glm(Wing_size~Treatment)
summary(mod)
mod2 <- update(mod,~-Treatment)
anova(mod,mod2, test="Chi")
library(car)
Anova(mod)
#      LR Chisq Df Pr(>Chisq)
#Treatment 109.23 3 < 2.2e-16 ***

```



```

library(multcomp)
summary(glht(mod,linfct = mcp(Treatment="Tukey"),interaction_averages = F))
#      Estimate Std. Error z value Pr(>|z|)
#FnI - FI == 0  -35.915    8.495  -4.228 0.000149 ***
#MI - FI == 0   -49.549    8.691  -5.701 < 1e-04 ***
#MnI - FI == 0  -86.478    8.391 -10.306 < 1e-04 ***
#MI - FnI == 0  -13.634    8.495  -1.605 0.375575
#MnI - FnI == 0  -50.563    8.188  -6.176 < 1e-04 ***
#MnI - MI == 0  -36.929    8.391  -4.401 < 1e-04 ***

ggplot(data2, aes(x=Treatment, y=Wing_size, fill=Treatment)) +
  geom_boxplot()+
  ylab("Wing size")+
  theme(legend.position = "non")
data.graph2 <- summarySE(data2, measurevar="Wing_size", groupvars="Treatment")
data.graph2
ggplot(data=data.graph2, aes(x=Treatment, y=Wing_size, fill=Treatment)) +
  coord_cartesian(ylim = c()) +
  ylab("Wing size ? se") +
  geom_bar(stat = "identity", position=position_dodge()) +
  geom_errorbar(aes(ymin=Wing_size-se,
ymax=Wing_size+se),position=position_dodge(.9), width=.1)+
  scale_fill_brewer(palette="Dark2")+
  theme(legend.position = "non")

```
